# Supplementary material for: Prediction of fatigue crack growth rate, maximum strain energy release rate, and total energy dissipation in adhesive bonds: a machine learning approach and interactive R-Shiny panel development
Source: PeerJ journal article supplement (doi:10.7717/peerj-cs.3450), 2026-01-09
Supplement: Table_S1.docx [file Table_S1.docx]

| Model | RMSE | Rsquared | MAE | MAPE | MdAE | RMSLE |
| --- | --- | --- | --- | --- | --- | --- |
| lm | 1.05E-05 | 0.9364115 | 7.50E-06 | 1.4459476 | 6.00E-06 | 1.05E-05 |
| ridge | 1.05E-05 | 0.9364115 | 7.50E-06 | 1.4459475 | 6.00E-06 | 1.05E-05 |
| lasso | 1.05E-05 | 0.9362242 | 7.50E-06 | 1.04974 | 6.00E-06 | 1.05E-05 |
| glmnet | 1.19E-05 | 0.9189069 | 8.50E-06 | 0.5973379 | 7.20E-06 | 1.19E-05 |
| rf | 4.00E-07 | 0.9999219 | 2.00E-07 | 0.0059554 | 1.00E-07 | 4.00E-07 |
| svmLinear | 1.32E-05 | 0.9288162 | 6.40E-06 | 0.1937819 | 4.00E-06 | 1.32E-05 |
| svmRadial | 2.50E-06 | 0.997803 | 2.10E-06 | 0.06562 | 2.30E-06 | 2.50E-06 |
| gbm | 8.00E-07 | 0.999593 | 5.00E-07 | 0.0122822 | 3.00E-07 | 8.00E-07 |
| rpart | 1.74E-05 | 0.8253332 | 1.37E-05 | 0.3894122 | 1.19E-05 | 1.74E-05 |
| xgbTree | 1.82E-05 | 0.8940051 | 1.26E-05 | 0.3002881 | 1.10E-05 | 1.82E-05 |
| knn | 6.00E-07 | 0.9997797 | 3.00E-07 | 0.0079188 | 2.00E-07 | 6.00E-07 |
| pls | 1.20E-05 | 0.9177937 | 8.50E-06 | 1.1189464 | 7.00E-06 | 1.20E-05 |
| gam | 6.00E-07 | 0.9997626 | 4.00E-07 | 0.0096451 | 2.00E-07 | 6.00E-07 |
| brnn | 6.00E-07 | 0.9997671 | 4.00E-07 | 0.0093637 | 2.00E-07 | 6.00E-07 |
| gaussprRadial | 2.10E-06 | 0.9977539 | 6.00E-07 | 0.0120208 | 3.00E-07 | 2.10E-06 |
| qrnn | 6.00E-07 | 0.9997691 | 4.00E-07 | 0.0092946 | 2.00E-07 | 6.00E-07 |
