# Supplementary material for: Prediction of fatigue crack growth rate, maximum strain energy release rate, and total energy dissipation in adhesive bonds: a machine learning approach and interactive R-Shiny panel development
Source: PeerJ journal article supplement (doi:10.7717/peerj-cs.3450), 2026-01-09
Supplement: Table_S2.docx [file Table_S2.docx]

| Model | RMSE | Rsquared | MAE | MAPE | MdAE | RMSLE |
| --- | --- | --- | --- | --- | --- | --- |
| lm | 1.12E-05 | 0.9333911 | 7.70E-06 | 2.4969842 | 6.10E-06 | 1.12E-05 |
| ridge | 1.12E-05 | 0.9333911 | 7.70E-06 | 2.4969842 | 6.10E-06 | 1.12E-05 |
| lasso | 1.12E-05 | 0.9331058 | 7.70E-06 | 1.070869 | 6.20E-06 | 1.12E-05 |
| glmnet | 1.27E-05 | 0.9150731 | 8.80E-06 | 0.6158764 | 7.40E-06 | 1.27E-05 |
| rf | 6.00E-07 | 0.9997844 | 3.00E-07 | 0.007964 | 2.00E-07 | 6.00E-07 |
| svmLinear | 1.44E-05 | 0.9253675 | 6.80E-06 | 0.1961169 | 4.00E-06 | 1.44E-05 |
| svmRadial | 2.60E-06 | 0.997742 | 2.10E-06 | 0.06537 | 2.30E-06 | 2.60E-06 |
| gbm | 9.00E-07 | 0.9995285 | 6.00E-07 | 0.0127273 | 3.00E-07 | 9.00E-07 |
| rpart | 1.80E-05 | 0.8267217 | 1.41E-05 | 0.3976046 | 1.20E-05 | 1.80E-05 |
| xgbTree | 1.92E-05 | 0.8960698 | 1.29E-05 | 0.3029514 | 1.11E-05 | 1.92E-05 |
| knn | 8.00E-07 | 0.9996598 | 4.00E-07 | 0.0092499 | 2.00E-07 | 8.00E-07 |
| pls | 1.27E-05 | 0.9137062 | 8.90E-06 | 0.9658782 | 7.40E-06 | 1.27E-05 |
| gam | 7.00E-07 | 0.9997466 | 4.00E-07 | 0.0098322 | 2.00E-07 | 7.00E-07 |
| brnn | 7.00E-07 | 0.9997487 | 4.00E-07 | 0.0096515 | 3.00E-07 | 7.00E-07 |
| gaussprRadial | 2.50E-06 | 0.9971979 | 6.00E-07 | 0.0121593 | 3.00E-07 | 2.50E-06 |
| qrnn | 7.00E-07 | 0.999752 | 4.00E-07 | 0.0096453 | 3.00E-07 | 7.00E-07 |
