# Supplementary material for: Prediction of fatigue crack growth rate, maximum strain energy release rate, and total energy dissipation in adhesive bonds: a machine learning approach and interactive R-Shiny panel development
Source: PeerJ journal article supplement (doi:10.7717/peerj-cs.3450), 2026-01-09
Supplement: Table_S3.docx [file Table_S3.docx]

| Model | RMSE_CV | Rsquared_CV |
| --- | --- | --- |
| lm | 1.05e-05 | 0.9365902 |
| ridge | 1.05e-05 | 0.9365902 |
| lasso | 1.05e-05 | 0.9364039 |
| glmnet | 1.19e-05 | 0.9190956 |
| rf | 6.00e-07 | 0.9997595 |
| svmLinear | 1.33e-05 | 0.9281998 |
| svmRadial | 3.20e-06 | 0.9956322 |
| gbm | 1.00e-06 | 0.9994158 |
| rpart | 1.39e-05 | 0.8823840 |
| xgbTree | 1.82e-05 | 0.8915005 |
| knn | 8.00e-07 | 0.9996744 |
| pls | 1.20e-05 | 0.9180005 |
| gam | 6.00e-07 | 0.9997600 |
| brnn | 6.00e-07 | 0.9997595 |
| gaussprRadial | 3.00e-06 | 0.9948892 |
| qrnn | 6.00e-07 | 0.9997658 |
