# Supplementary material for: Prediction of fatigue crack growth rate, maximum strain energy release rate, and total energy dissipation in adhesive bonds: a machine learning approach and interactive R-Shiny panel development
Source: PeerJ journal article supplement (doi:10.7717/peerj-cs.3450), 2026-01-09
Supplement: Table_S4.docx [file Table_S4.docx]

| Model_Type | MAE | Rsquared | Correlation |
| --- | --- | --- | --- |
| brnn | 0.000000 | 0.9997 | 0.9999 |
| gam | 0.000000 | 0.9997 | 0.9999 |
| gaussprRadial | 0.000001 | 0.9972 | 0.9986 |
| gbm | 0.000001 | 0.9995 | 0.9998 |
| glmnet | 0.000009 | 0.9151 | 0.9566 |
| knn | 0.000000 | 0.9997 | 0.9998 |
| lasso | 0.000008 | 0.9331 | 0.9660 |
| lm | 0.000008 | 0.9334 | 0.9661 |
| pls | 0.000009 | 0.9137 | 0.9559 |
| qrnn | 0.000000 | 0.9998 | 0.9999 |
| rf | 0.000000 | 0.9998 | 0.9999 |
| ridge | 0.000008 | 0.9334 | 0.9661 |
| rpart | 0.000014 | 0.8267 | 0.9092 |
| svmLinear | 0.000007 | 0.9254 | 0.9620 |
| svmRadial | 0.000002 | 0.9977 | 0.9989 |
| xgbTree | 0.000013 | 0.8961 | 0.9466 |
