# Supplementary material for: Prediction of fatigue crack growth rate, maximum strain energy release rate, and total energy dissipation in adhesive bonds: a machine learning approach and interactive R-Shiny panel development
Source: PeerJ journal article supplement (doi:10.7717/peerj-cs.3450), 2026-01-09
Supplement: Table_S5.docx [file Table_S5.docx]

| Model | RMSE | Rsquared | MAE | MAPE | MdAE | RMSLE |
| --- | --- | --- | --- | --- | --- | --- |
| lm | 0.9208811 | 0.9991365 | 0.7191930 | 0.0029228 | 0.5954712 | 0.0036652 |
| ridge | 0.9208811 | 0.9991365 | 0.7191930 | 0.0029228 | 0.5954712 | 0.0036652 |
| lasso | 1.0595362 | 0.9988644 | 0.8100596 | 0.0032342 | 0.6562615 | 0.0040447 |
| glmnet | 1.0769953 | 0.9988266 | 0.7947848 | 0.0031421 | 0.6305073 | 0.0040021 |
| rf | 0.2722676 | 0.9999245 | 0.1978881 | 0.0008079 | 0.1415167 | 0.0011046 |
| svmLinear | 1.0956242 | 0.9988376 | 0.8756026 | 0.0035746 | 0.7451855 | 0.0044427 |
| svmRadial | 1.3385492 | 0.9984019 | 1.0922868 | 0.0044948 | 0.9770955 | 0.0054530 |
| gbm | 0.7683982 | 0.9993988 | 0.5970438 | 0.0024197 | 0.4762210 | 0.0030564 |
| rpart | 13.2901378 | 0.8201438 | 9.0842882 | 0.0349078 | 6.5894581 | 0.0467434 |
| xgbTree | 0.5317003 | 0.9997121 | 0.4141331 | 0.0016941 | 0.3389435 | 0.0021564 |
| knn | 0.7765923 | 0.9993915 | 0.6125193 | 0.0025071 | 0.5000000 | 0.0031493 |
| pls | 1.1141053 | 0.9987361 | 0.8793232 | 0.0035748 | 0.7322636 | 0.0044417 |
| gam | 0.5488894 | 0.9996932 | 0.4284562 | 0.0017631 | 0.3581379 | 0.0022502 |
| brnn | 0.4976371 | 0.9997478 | 0.3813067 | 0.0015751 | 0.3113732 | 0.0020504 |
| gaussprRadial | 1.2684193 | 0.9984376 | 0.6318306 | 0.0024734 | 0.4288429 | 0.0042319 |
| qrnn | 0.4416849 | 0.9998015 | 0.3471709 | 0.0014323 | 0.2902205 | 0.0018172 |
