# Supplementary material for: Prediction of fatigue crack growth rate, maximum strain energy release rate, and total energy dissipation in adhesive bonds: a machine learning approach and interactive R-Shiny panel development
Source: PeerJ journal article supplement (doi:10.7717/peerj-cs.3450), 2026-01-09
Supplement: Table_S6.docx [file Table_S6.docx]

| Model | RMSE | Rsquared | MAE | MAPE | MdAE | RMSLE |
| --- | --- | --- | --- | --- | --- | --- |
| lm | 0.9743208 | 0.9990697 | 0.7579175 | 0.0030674 | 0.6364417 | 0.0038364 |
| ridge | 0.9743208 | 0.9990697 | 0.7579175 | 0.0030674 | 0.6364417 | 0.0038364 |
| lasso | 1.1249697 | 0.9987849 | 0.8375417 | 0.0033208 | 0.6636962 | 0.0042162 |
| glmnet | 1.1423637 | 0.9987502 | 0.8122660 | 0.0031829 | 0.6304342 | 0.0041448 |
| rf | 0.5473911 | 0.9997049 | 0.3924590 | 0.0015939 | 0.2881667 | 0.0021950 |
| svmLinear | 1.0902098 | 0.9988530 | 0.8739551 | 0.0035705 | 0.7613041 | 0.0044283 |
| svmRadial | 1.3848590 | 0.9983345 | 1.1059289 | 0.0045299 | 0.9814788 | 0.0055686 |
| gbm | 0.8160719 | 0.9993444 | 0.6306375 | 0.0025426 | 0.5059594 | 0.0032140 |
| rpart | 13.9371062 | 0.8080245 | 9.4454338 | 0.0362673 | 6.5894581 | 0.0487181 |
| xgbTree | 0.6587892 | 0.9995739 | 0.4980635 | 0.0020106 | 0.4003143 | 0.0025929 |
| knn | 0.8738076 | 0.9992573 | 0.6919208 | 0.0028245 | 0.5714286 | 0.0035312 |
| pls | 1.1348389 | 0.9987360 | 0.8834401 | 0.0035792 | 0.7345943 | 0.0044882 |
| gam | 0.5593815 | 0.9996910 | 0.4264601 | 0.0017515 | 0.3503308 | 0.0022662 |
| brnn | 0.5219779 | 0.9997318 | 0.3903578 | 0.0016053 | 0.3189023 | 0.0021154 |
| gaussprRadial | 1.3281454 | 0.9983903 | 0.6762424 | 0.0026252 | 0.4476365 | 0.0043789 |
| qrnn | 0.4539864 | 0.9997973 | 0.3588024 | 0.0014733 | 0.3032419 | 0.0018456 |
