# Supplementary material for: Prediction of fatigue crack growth rate, maximum strain energy release rate, and total energy dissipation in adhesive bonds: a machine learning approach and interactive R-Shiny panel development
Source: PeerJ journal article supplement (doi:10.7717/peerj-cs.3450), 2026-01-09
Supplement: Table_S7.docx [file Table_S7.docx]

| Model | RMSE_CV | Rsquared_CV |
| --- | --- | --- |
| lm | 0.9225782 | 0.9991348 |
| ridge | 0.9225782 | 0.9991348 |
| lasso | 1.0583177 | 0.9988702 |
| glmnet | 1.0783991 | 0.9988276 |
| rf | 0.5914971 | 0.9996437 |
| svmLinear | 1.1130642 | 0.9988079 |
| svmRadial | 1.5102255 | 0.9978824 |
| gbm | 0.8246270 | 0.9993100 |
| rpart | 13.1201965 | 0.8249543 |
| xgbTree | 0.6724009 | 0.9995396 |
| knn | 0.9011671 | 0.9991808 |
| pls | 1.1155529 | 0.9987354 |
| gam | 0.5544139 | 0.9996868 |
| brnn | 0.4852953 | 0.9997595 |
| gaussprRadial | 1.6083684 | 0.9973356 |
| qrnn | 0.4450891 | 0.9997984 |
