# Supplementary material for: Prediction of fatigue crack growth rate, maximum strain energy release rate, and total energy dissipation in adhesive bonds: a machine learning approach and interactive R-Shiny panel development
Source: PeerJ journal article supplement (doi:10.7717/peerj-cs.3450), 2026-01-09
Supplement: Table_S8.docx [file Table_S8.docx]

| Model_Type | MAE | Rsquared | Correlation |
| --- | --- | --- | --- |
| brnn | 0.390358 | 0.9997 | 0.9999 |
| gam | 0.426460 | 0.9997 | 0.9998 |
| gaussprRadial | 0.676242 | 0.9984 | 0.9992 |
| gbm | 0.630637 | 0.9993 | 0.9997 |
| glmnet | 0.812266 | 0.9988 | 0.9994 |
| knn | 0.691921 | 0.9993 | 0.9996 |
| lasso | 0.837542 | 0.9988 | 0.9994 |
| lm | 0.757917 | 0.9991 | 0.9995 |
| pls | 0.883440 | 0.9987 | 0.9994 |
| qrnn | 0.358802 | 0.9998 | 0.9999 |
| rf | 0.392459 | 0.9997 | 0.9999 |
| ridge | 0.757917 | 0.9991 | 0.9995 |
| rpart | 9.445434 | 0.8080 | 0.8989 |
| svmLinear | 0.873955 | 0.9989 | 0.9994 |
| svmRadial | 1.105929 | 0.9983 | 0.9992 |
| xgbTree | 0.498063 | 0.9996 | 0.9998 |
