# Supplementary material for: Prediction of fatigue crack growth rate, maximum strain energy release rate, and total energy dissipation in adhesive bonds: a machine learning approach and interactive R-Shiny panel development
Source: PeerJ journal article supplement (doi:10.7717/peerj-cs.3450), 2026-01-09
Supplement: Table_S9.docx [file Table_S9.docx]

| Model | RMSE | Rsquared | MAE | MAPE | MdAE | RMSLE |
| --- | --- | --- | --- | --- | --- | --- |
| lm | 0.0081739 | 0.9836704 | 0.0064365 | 0.0185211 | 0.0061195 | 0.0058196 |
| ridge | 0.0081739 | 0.9836704 | 0.0064365 | 0.0185211 | 0.0061195 | 0.0058196 |
| lasso | 0.0102768 | 0.9836641 | 0.0061196 | 0.0160265 | 0.0044902 | 0.0069620 |
| glmnet | 0.0081861 | 0.9836641 | 0.0063385 | 0.0181230 | 0.0059491 | 0.0057971 |
| rf | 0.0006592 | 0.9998938 | 0.0005160 | 0.0015350 | 0.0004292 | 0.0004892 |
| svmLinear | 0.0084577 | 0.9836704 | 0.0059588 | 0.0166581 | 0.0050280 | 0.0058647 |
| svmRadial | 0.0036371 | 0.9980845 | 0.0033122 | 0.0097864 | 0.0034913 | 0.0027061 |
| gbm | 0.0012368 | 0.9996261 | 0.0009441 | 0.0027332 | 0.0007362 | 0.0009041 |
| rpart | 0.0270856 | 0.8206934 | 0.0228865 | 0.0682483 | 0.0216214 | 0.0200643 |
| xgbTree | 0.0017398 | 0.9992604 | 0.0011406 | 0.0032898 | 0.0007092 | 0.0012692 |
| knn | 0.0009948 | 0.9997582 | 0.0006766 | 0.0019434 | 0.0005000 | 0.0007118 |
| pls | 0.0624362 | 0.0472182 | 0.0476874 | 0.1390965 | 0.0401572 | 0.0450663 |
| gam | 0.0010002 | 0.9997555 | 0.0007771 | 0.0022817 | 0.0006283 | 0.0007371 |
| brnn | 0.0008917 | 0.9998057 | 0.0006812 | 0.0020010 | 0.0005402 | 0.0006569 |
| gaussprRadial | 0.0016381 | 0.9994291 | 0.0008439 | 0.0023788 | 0.0005844 | 0.0011037 |
| qrnn | 0.0008337 | 0.9998302 | 0.0006296 | 0.0018586 | 0.0004884 | 0.0006159 |
