# Supplementary material for: Prediction of fatigue crack growth rate, maximum strain energy release rate, and total energy dissipation in adhesive bonds: a machine learning approach and interactive R-Shiny panel development
Source: PeerJ journal article supplement (doi:10.7717/peerj-cs.3450), 2026-01-09
Supplement: Table_S10.docx [file Table_S10.docx]

| Model | RMSE | Rsquared | MAE | MAPE | MdAE | RMSLE |
| --- | --- | --- | --- | --- | --- | --- |
| lm | 0.0086031 | 0.9821850 | 0.0067112 | 0.0192137 | 0.0063300 | 0.0060941 |
| ridge | 0.0086031 | 0.9821850 | 0.0067112 | 0.0192137 | 0.0063300 | 0.0060941 |
| lasso | 0.0107619 | 0.9821773 | 0.0062581 | 0.0163094 | 0.0045249 | 0.0072589 |
| glmnet | 0.0086259 | 0.9821773 | 0.0066112 | 0.0188079 | 0.0061316 | 0.0060775 |
| rf | 0.0009517 | 0.9997842 | 0.0007050 | 0.0020556 | 0.0005381 | 0.0006966 |
| svmLinear | 0.0089304 | 0.9821848 | 0.0062082 | 0.0172732 | 0.0052785 | 0.0061632 |
| svmRadial | 0.0036672 | 0.9981449 | 0.0033232 | 0.0097819 | 0.0035312 | 0.0027224 |
| gbm | 0.0012808 | 0.9996070 | 0.0009756 | 0.0028164 | 0.0007598 | 0.0009332 |
| rpart | 0.0280510 | 0.8105164 | 0.0235574 | 0.0702132 | 0.0223786 | 0.0207526 |
| xgbTree | 0.0019037 | 0.9991287 | 0.0012167 | 0.0035068 | 0.0007392 | 0.0013892 |
| knn | 0.0011097 | 0.9997038 | 0.0007521 | 0.0021615 | 0.0005556 | 0.0007982 |
| pls | 0.0628219 | 0.0494552 | 0.0477197 | 0.1390183 | 0.0400004 | 0.0452804 |
| gam | 0.0009817 | 0.9997687 | 0.0007693 | 0.0022746 | 0.0006498 | 0.0007256 |
| brnn | 0.0008917 | 0.9998096 | 0.0006751 | 0.0019840 | 0.0005330 | 0.0006550 |
| gaussprRadial | 0.0020333 | 0.9991737 | 0.0008930 | 0.0024536 | 0.0005646 | 0.0013435 |
| qrnn | 0.0008333 | 0.9998333 | 0.0006262 | 0.0018526 | 0.0004947 | 0.0006149 |
