# Supplementary material for: Prediction of fatigue crack growth rate, maximum strain energy release rate, and total energy dissipation in adhesive bonds: a machine learning approach and interactive R-Shiny panel development
Source: PeerJ journal article supplement (doi:10.7717/peerj-cs.3450), 2026-01-09
Supplement: Table_S11.docx [file Table_S11.docx]

| Model | RMSE_CV | Rsquared_CV |
| --- | --- | --- |
| lm | 0.0081830 | 0.9837074 |
| ridge | 0.0081830 | 0.9837074 |
| lasso | 0.0102686 | 0.9837256 |
| glmnet | 0.0081883 | 0.9837256 |
| rf | 0.0009586 | 0.9997754 |
| svmLinear | 0.0084603 | 0.9837215 |
| svmRadial | 0.0037054 | 0.9980530 |
| gbm | 0.0013444 | 0.9995578 |
| rpart | 0.0232955 | 0.8617552 |
| xgbTree | 0.0015712 | 0.9993627 |
| knn | 0.0012977 | 0.9995839 |
| pls | 0.0624558 | 0.0491733 |
| gam | 0.0010097 | 0.9997510 |
| brnn | 0.0009816 | 0.9997626 |
| gaussprRadial | 0.0019817 | 0.9991751 |
| qrnn | 0.0008369 | 0.9998289 |
